# Supplementary material for: Transcriptomics-driven metabolic pathway analysis reveals similar alterations in lipid metabolism in mouse MASH model and human
Source: PubMed Central journal article supplement (PMC10914730; doi:10.1038/s43856-024-00465-3), 2024-03-05
Supplement: 43856_2024_465_MOESM2_ESM.pdf [file 43856_2024_465_MOESM2_ESM.pdf]

1 **Description of Additional Supplementary Files**

2

3 **File Name:** Supplementary Data 1

4 **Description:** List of 252 statistically significant (FDR < 0.05) lipids and metabolites

5
